# Supplementary material
Source: publisher site journal article supplement (https://www.dovepress.com/article/582933)
Supplement: Supplementary file 1 [file 582933%20Supplementary.docx]

**Supplementary Table S1** Comparison of baseline characteristics between patients with and without available 1-month NK-cell measurements.

| **Characteristics** | **With NK (n = 58)** | **Without NK (n = 47)** | ***P value*** | |
| --- | --- | --- | --- | --- |
| Sex, n (%) |  |  | | 0.658 |
| male | 44 (75.9%) | 33 (70.2%) | |  |
| female | 14 (24.1%) | 14 (29.8%) | |  |
| Age (years), median (range) |  |  | | 0.333 |
| < 18 | 10 (2–16) | 11 (2–16) | |  |
| ≥ 18 | 29 (18–53) | 31 (18–50) | |  |
| WBC (×109/L) a, median (range) | 60.44 (0.97–800) | 79.54 (1.20–781.78) | | 0.562 |
| Chemotherapy cycles b, median (range) | 4 (2–23) | 5 (2–15) | | 0.510 |
| Duration (months) c, median (range) | 6.835 (1.93–31.40) | 7.3 (2.70–80.53) | | 0.151 |
| BM morphology d, n (%) |  |  | | 1.000 |
| CR | 55 (94.8%) | 44 (93.6%) | |  |
| non-CR | 3 (5.2%) | 3 (6.4%) | |  |
| MRD pre-UCBT e, n (%) |  |  | | 0.536 |
| negative | 53 (91.4%) | 41 (87.2%) | |  |
| positive | 5 (8.6%) | 6 (12.8%) | |  |
| EMD pre-UCBT, n (%) |  |  | | 1.000 |
| negative | 55 (94.8%) | 44 (93.6%) | |  |
| positive | 3 (5.2%) | 3 (6.4%) | |  |
| R-DRI score f, n (%) |  |  | | 0.851 |
| 2 | 39 (67.2%) | 34 (72.3%) | |  |
| 3 | 10 (17.2%) | 7 (14.9%) | |  |
| 4 | 9 (15.5%) | 6 (12.8%) | |  |
| Donor to recipient sex, n (%) |  |  | | 0.108 |
| female to male | 27 (46.6%) | 14 (29.8%) | |  |
| others | 31 (53.4%) | 33 (70.2%) | |  |
| HLA Compatibility (/10), n (%) |  |  | | 0.001 |
| ≥ 9 | 13 (22.4%) | 2 (4.3%) | |  |
| 7 or 8 | 35 (60.3%) | 22 (46.8%) | |  |
| ≤ 6 | 10 (17.2%) | 23 (48.9%) | |  |
| ABO incompatibility, n (%) |  |  | | 0.195 |
| identical | 12 (20.7%) | 16 (34.0%) | |  |
| major incompatibility | 16 (27.6%) | 15 (31.9%) | |  |
| minor incompatibility | 18 (31.0%) | 12 (25.5%) | |  |
| bidirectional incompatibility | 12 (20.7%) | 4 (8.5%) | |  |
| Conditioning regimen, n (%) |  |  | | 0.491 |
| busulfan-based | 46 (79.3%) | 34 (72.3%) | |  |
| irradiation-based | 12 (20.7%) | 13 (27.7%) | |  |
| Infused TNCs (×107/kg), median (range) | 3.13 (1.06–10.2) | 3.10 (1.02–8.1) | | 0.905 |
| Infused CD34+ cells (×105/kg), median (range) | 2.375 (0.25–9.4) | 2.05 (0.334–8.41) | | 0.280 |
| Infused CD56+ cells (×105/kg), median (range) | 2.58 (0.2–17.5) | 2.50 (0.26–8.42) | | 0.721 |

**Notes:** a, the White Blood Cell counts of peripheral blood at diagnosis; b, chemotherapy cycles pre-UCBT; c, Duration from diagnosis to UCBT; d, CR/non-CR reflects morphologic remission status based on bone marrow morphology prior to transplantation; e, MRD pre-UCBT, measurable residual disease by flow cytometry before UCBT; f, R-DRI is a transplant-oriented risk stratification system that classifies patients into 4 categories: low, intermediate, high, and very high risk, according to disease type and disease status at transplantation. In the present T-ALL/LBL cohort, only intermediate (score 2), high (score 3), and very high (score 4) categories were represented.

**Abbreviations:** T-ALL, t-cell acute lymphoblastic leukemia; T-LBL, t-lymphoblastic lymphoma; WBC, white blood cell; UCBT, umbilical cord blood transplantation; BM, bone marrow; CR, complete remission by bone marrow morphology; MRD pre-UCBT, minimal residual disease by flow cytometry​​ before UCBT; EMD pre-UCBT, extramedullary disease before UCBT; R-DRI, refined disease risk index; HLA, human leukocyte antigen; TNCs, total nucleated cells of umbilical cord blood.

**Supplementary Table S2** Breakdown of refined Disease Risk Index (R-DRI) categories according to disease presentation in the study cohort.

| **Disease presentation** | **R-DRI 2 (Intermediate)** | **R-DRI 3 (High)** | **R-DRI 4 (Very high)** | **Total** |
| --- | --- | --- | --- | --- |
| T-ALL | 44 | 17 | 11 | 72 |
| T-LBL | 7 | 0 | 0 | 7 |
| T-ALL with concurrent lymphadenopathy or lymphomatous/extramedullary involvementa | 22 | 0 | 4 | 26 |
| Total | 73 | 17 | 15 | 105 |

**Notes:** a, T-ALL with concurrent lymphadenopathy or lymphomatous/extramedullary involvement refers to patients with T-ALL who also had lymph node enlargement or lymphomatous/extramedullary manifestations at presentation. For R-DRI assignment, these cases were categorized according to the ALL framework when bone marrow disease was the primary basis for classification, and the final R-DRI score was assigned according to disease status at transplantation.

**Abbreviations:** T-ALL, t-cell acute lymphoblastic leukemia; T-LBL, t-lymphoblastic lymphoma; R-DRI, the refined disease risk index.


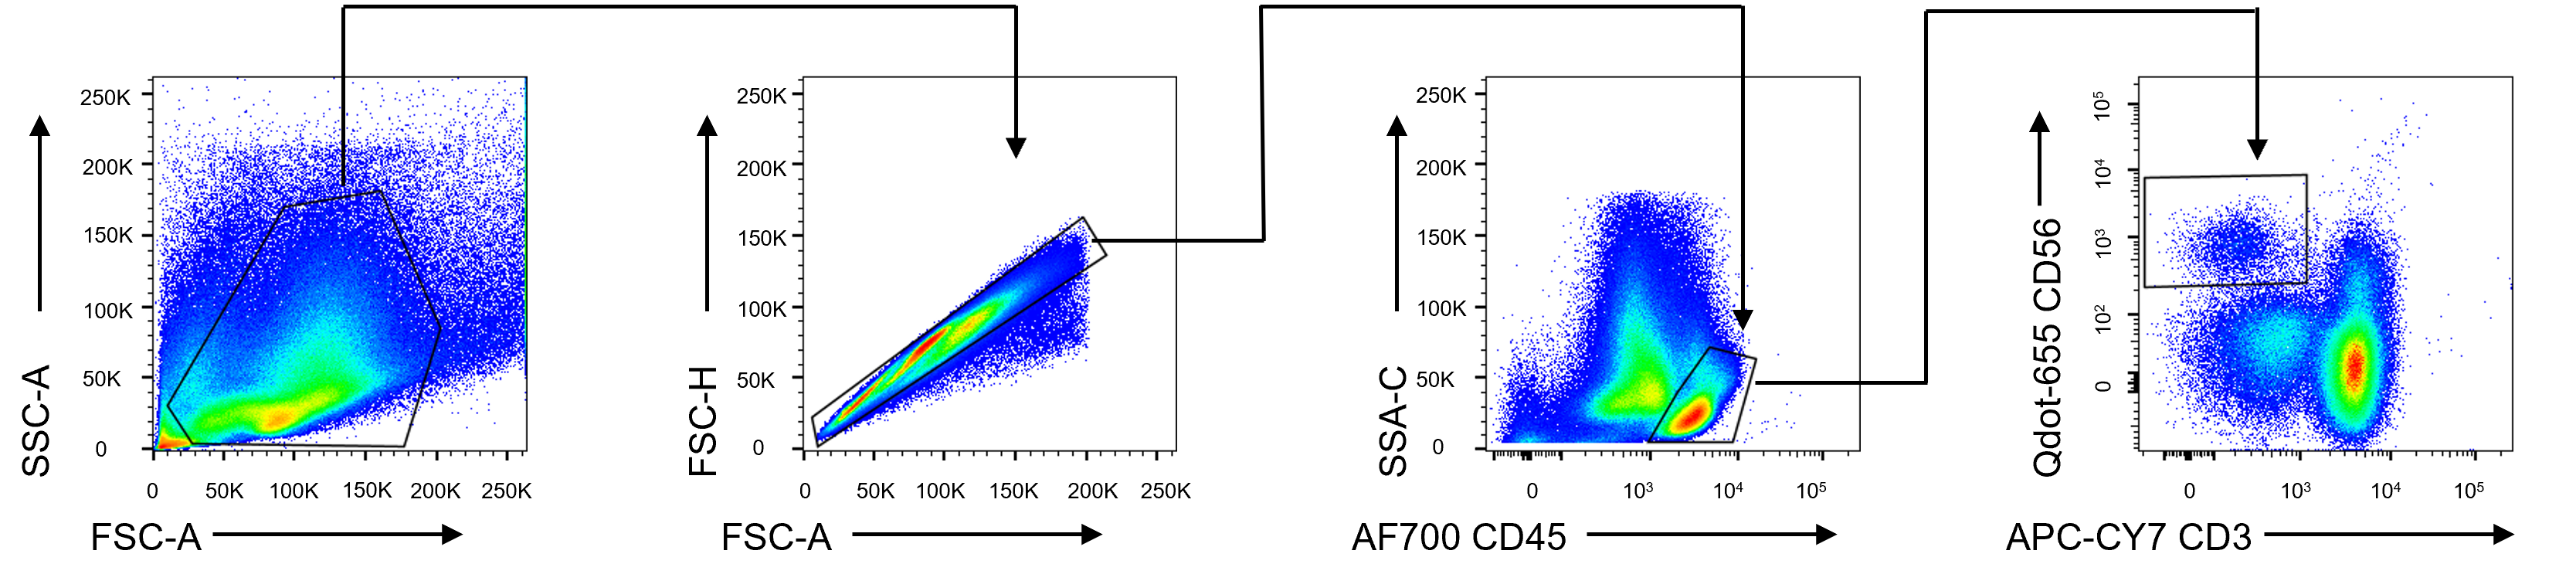


**Supplementary Figure S1** Analysis of peripheral NK cells by flow cytometry. NK cells were defined as CD45+CD3–CD56+ cells.

NK cells, natural killer cells, FSC, forward scatter light; SSC, side scatter light; CD, cluster of differentiation.

**
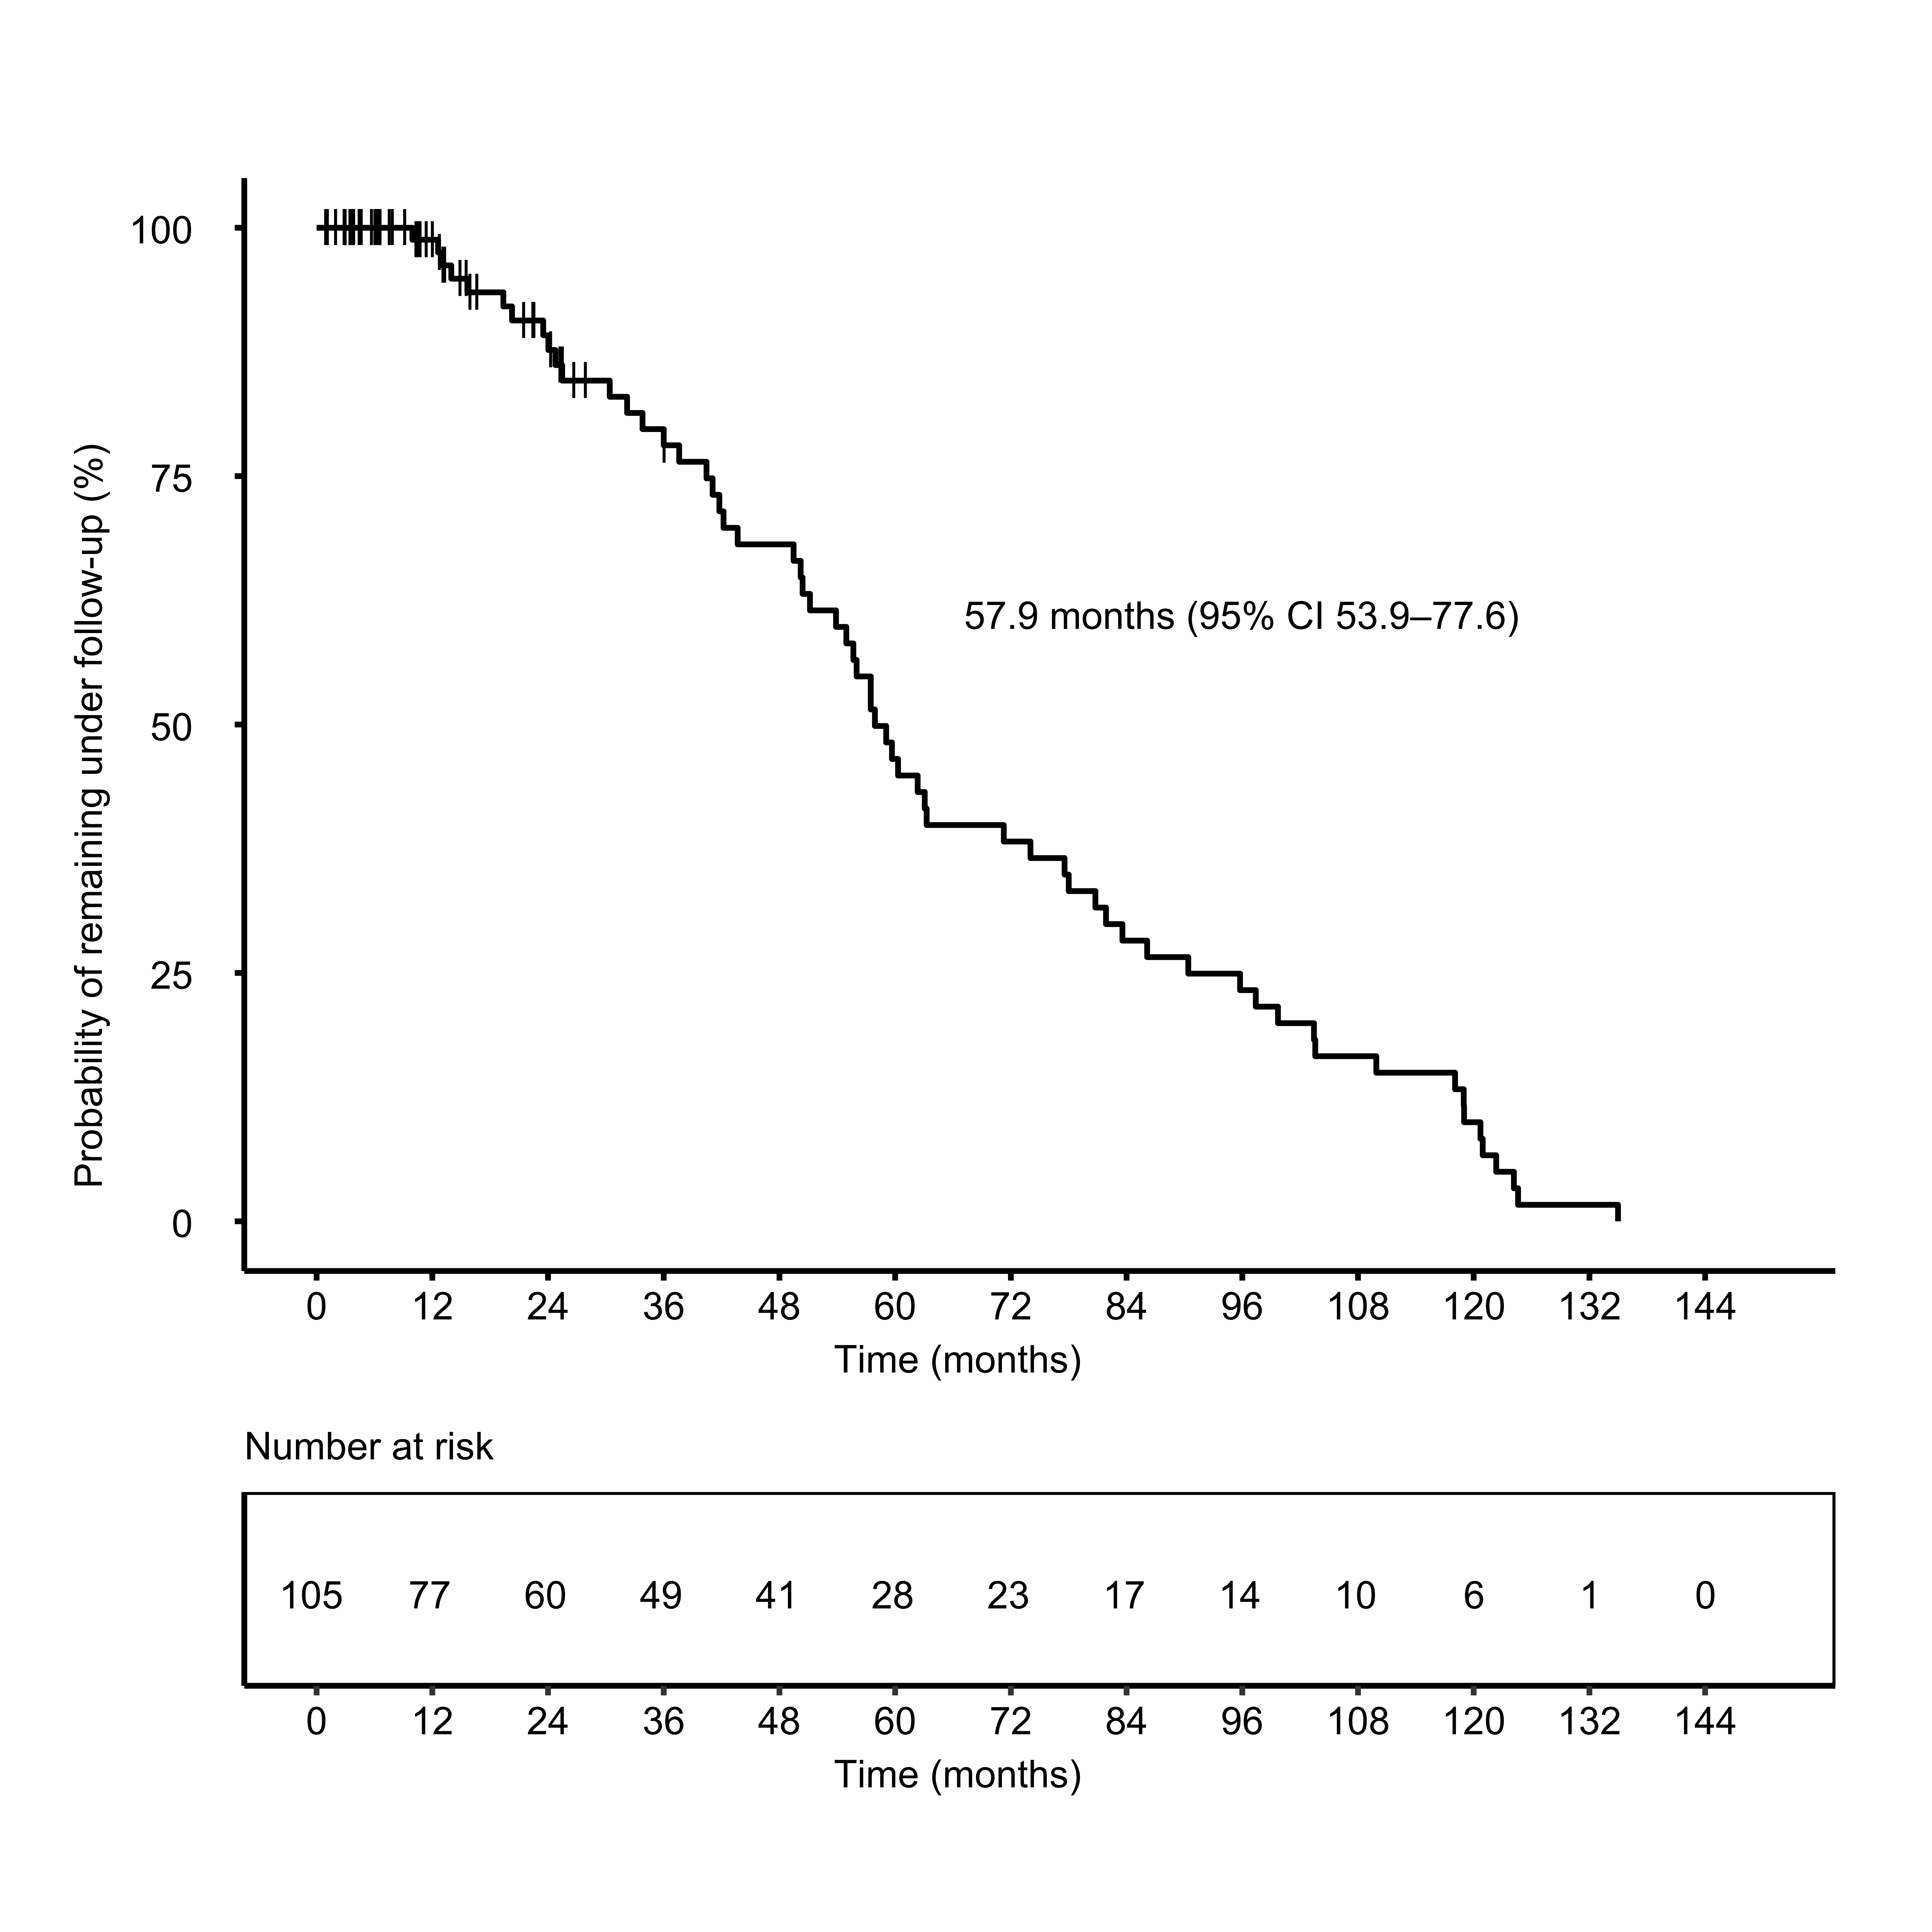
**

**Supplementary Figure S2** Reverse Kaplan–Meier estimate of follow-up duration in the overall cohort, illustrating the distribution of follow-up time. The median follow-up time was 57.9 months (95% CI, 53.9–77.6 months). Numbers at risk are shown below the plot. CI, confidence interval.





**Supplementary Figure S3** Cumulative incidence of neutrophil engraftment (A); platelet engraftment (B). CI, confidence interval.





**Supplementary Figure S4** Cumulative incidence of II–IV aGVHD (A); III–IV aGVHD (B).

aGVHD, acute graft-versus-host disease.





**Supplementary Figure S5** Cumulative incidence of 3-year cGVHD (A); moderate to severe cGVHD (B).

cGVHD, chronic graft-versus-host disease. CI, confidence interval.

**
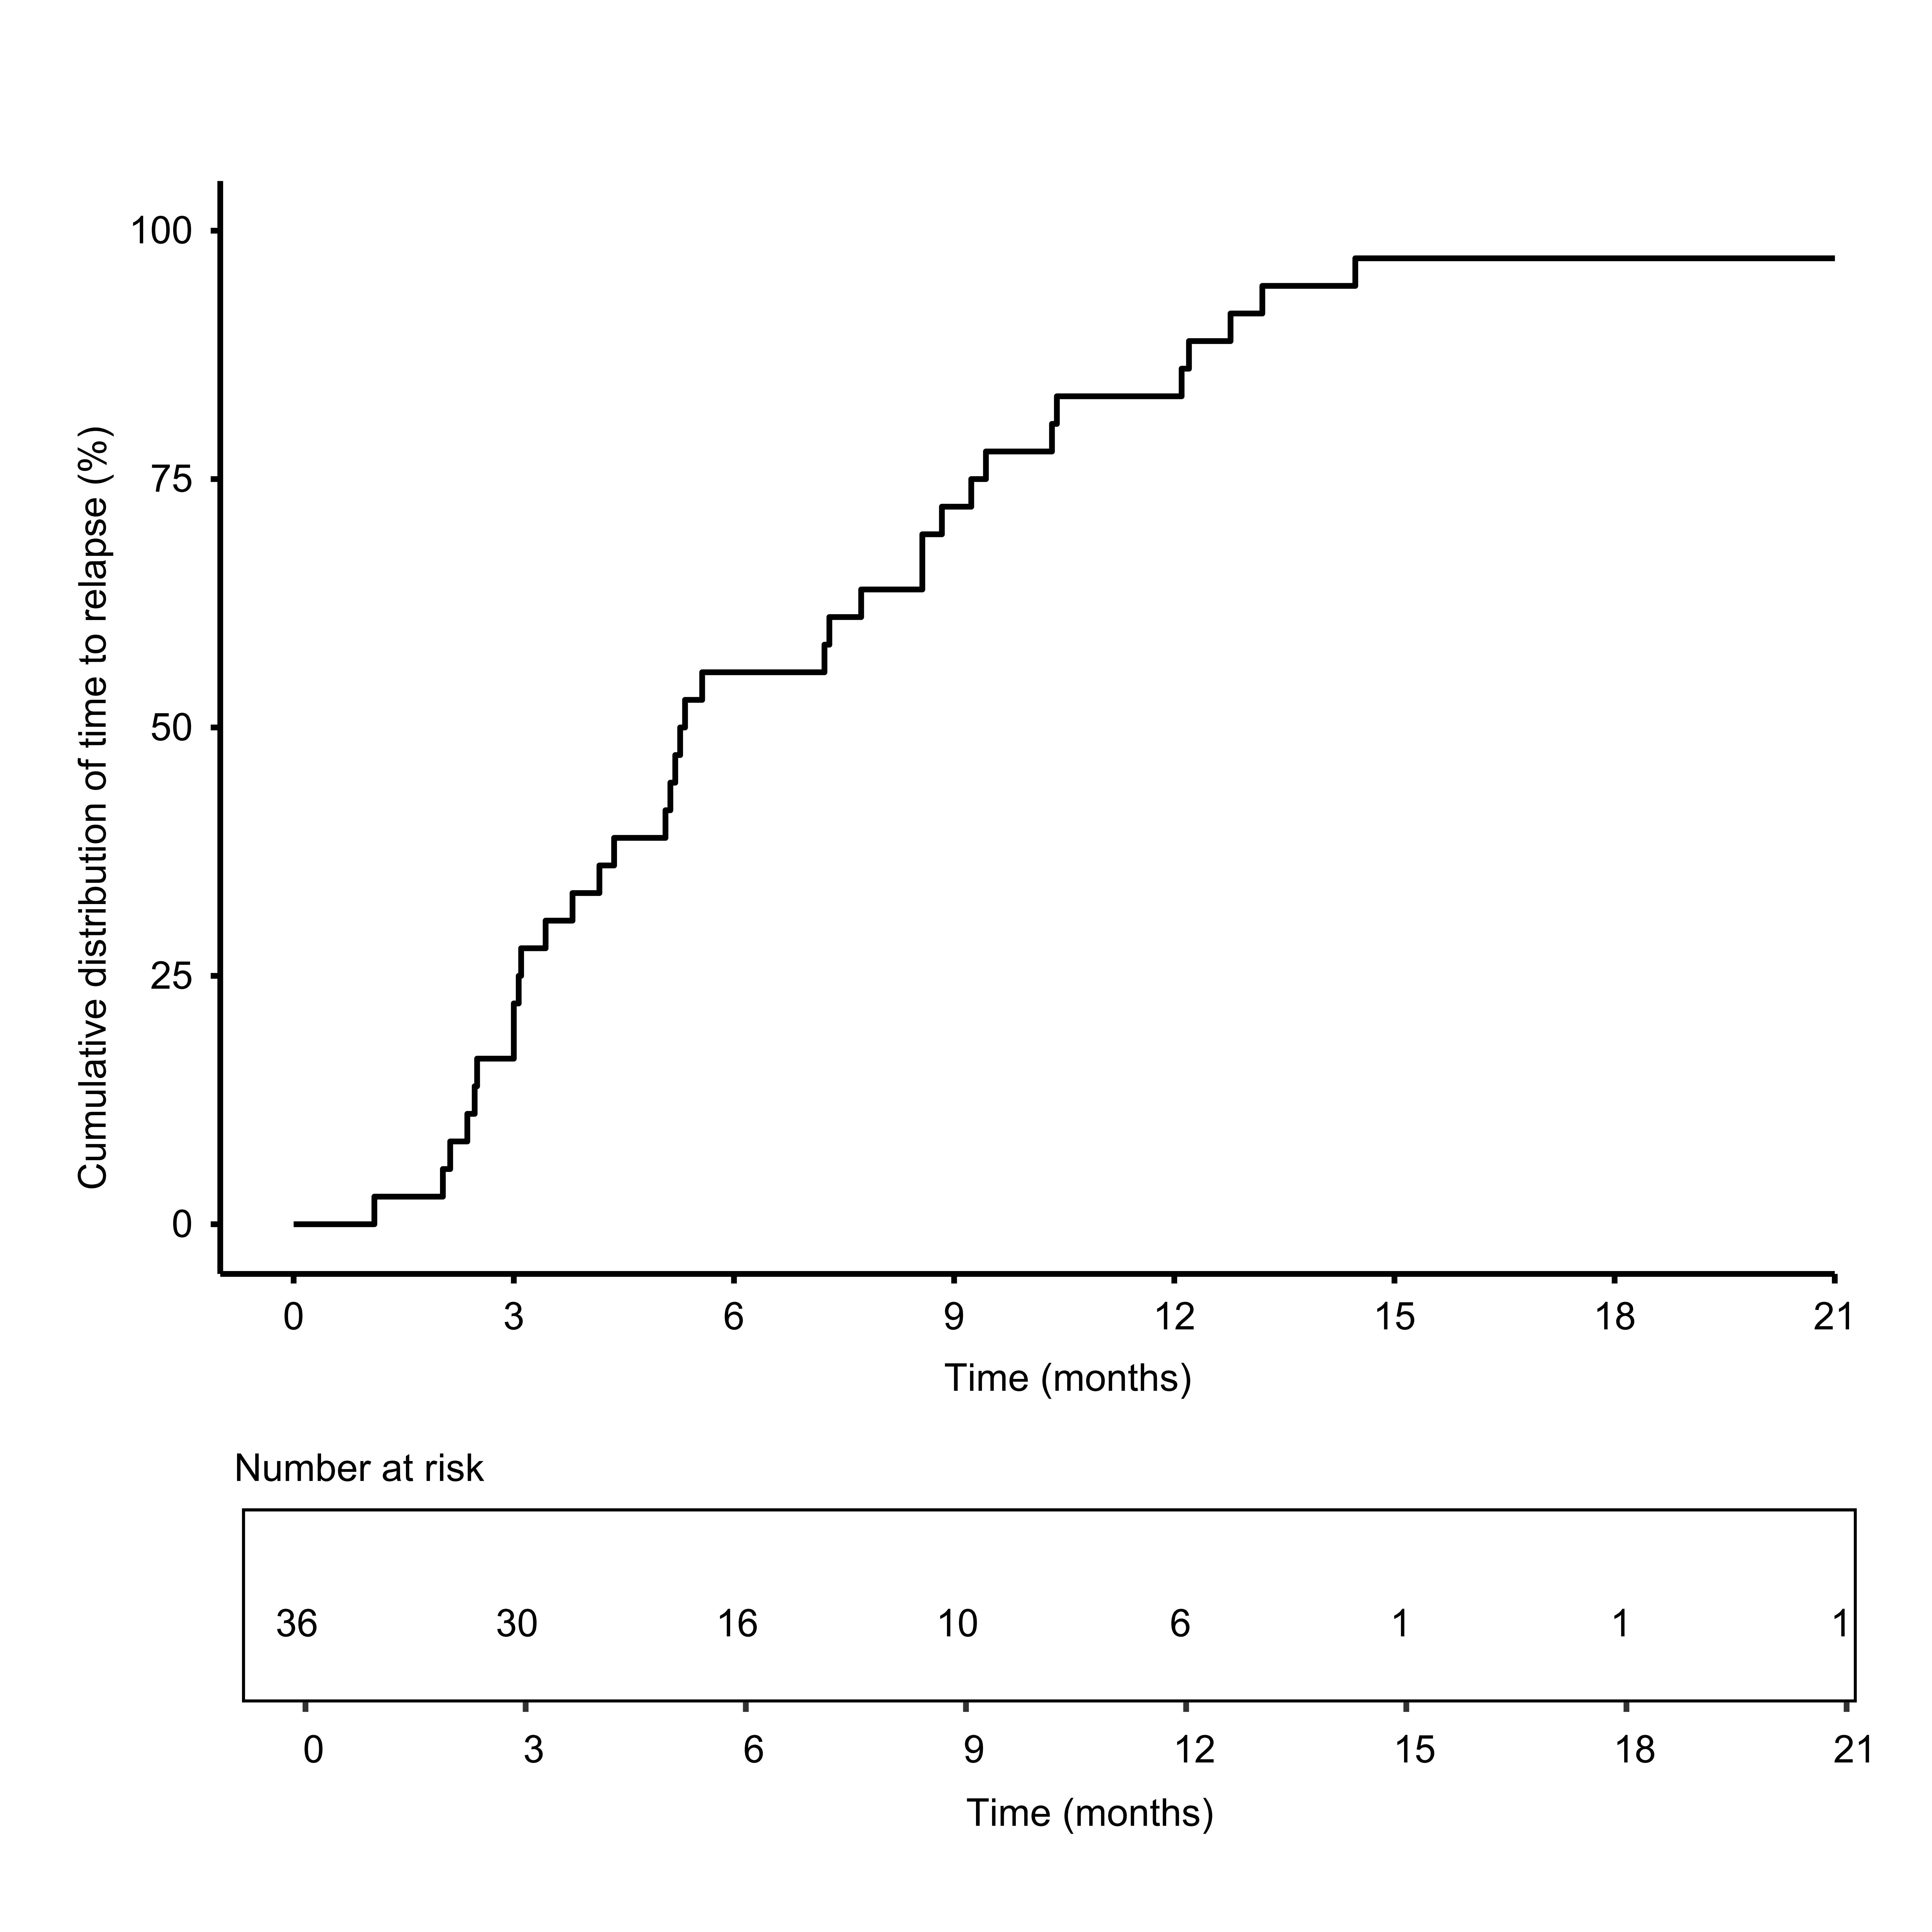
**

**Supplementary Figure S6.** Kaplan–Meier curve showing the distribution of time to relapse among patients who experienced relapse after UCBT. The median time to relapse was 5.3 months. Numbers at risk are shown below the plot. UCBT, umbilical cord blood transplantation.


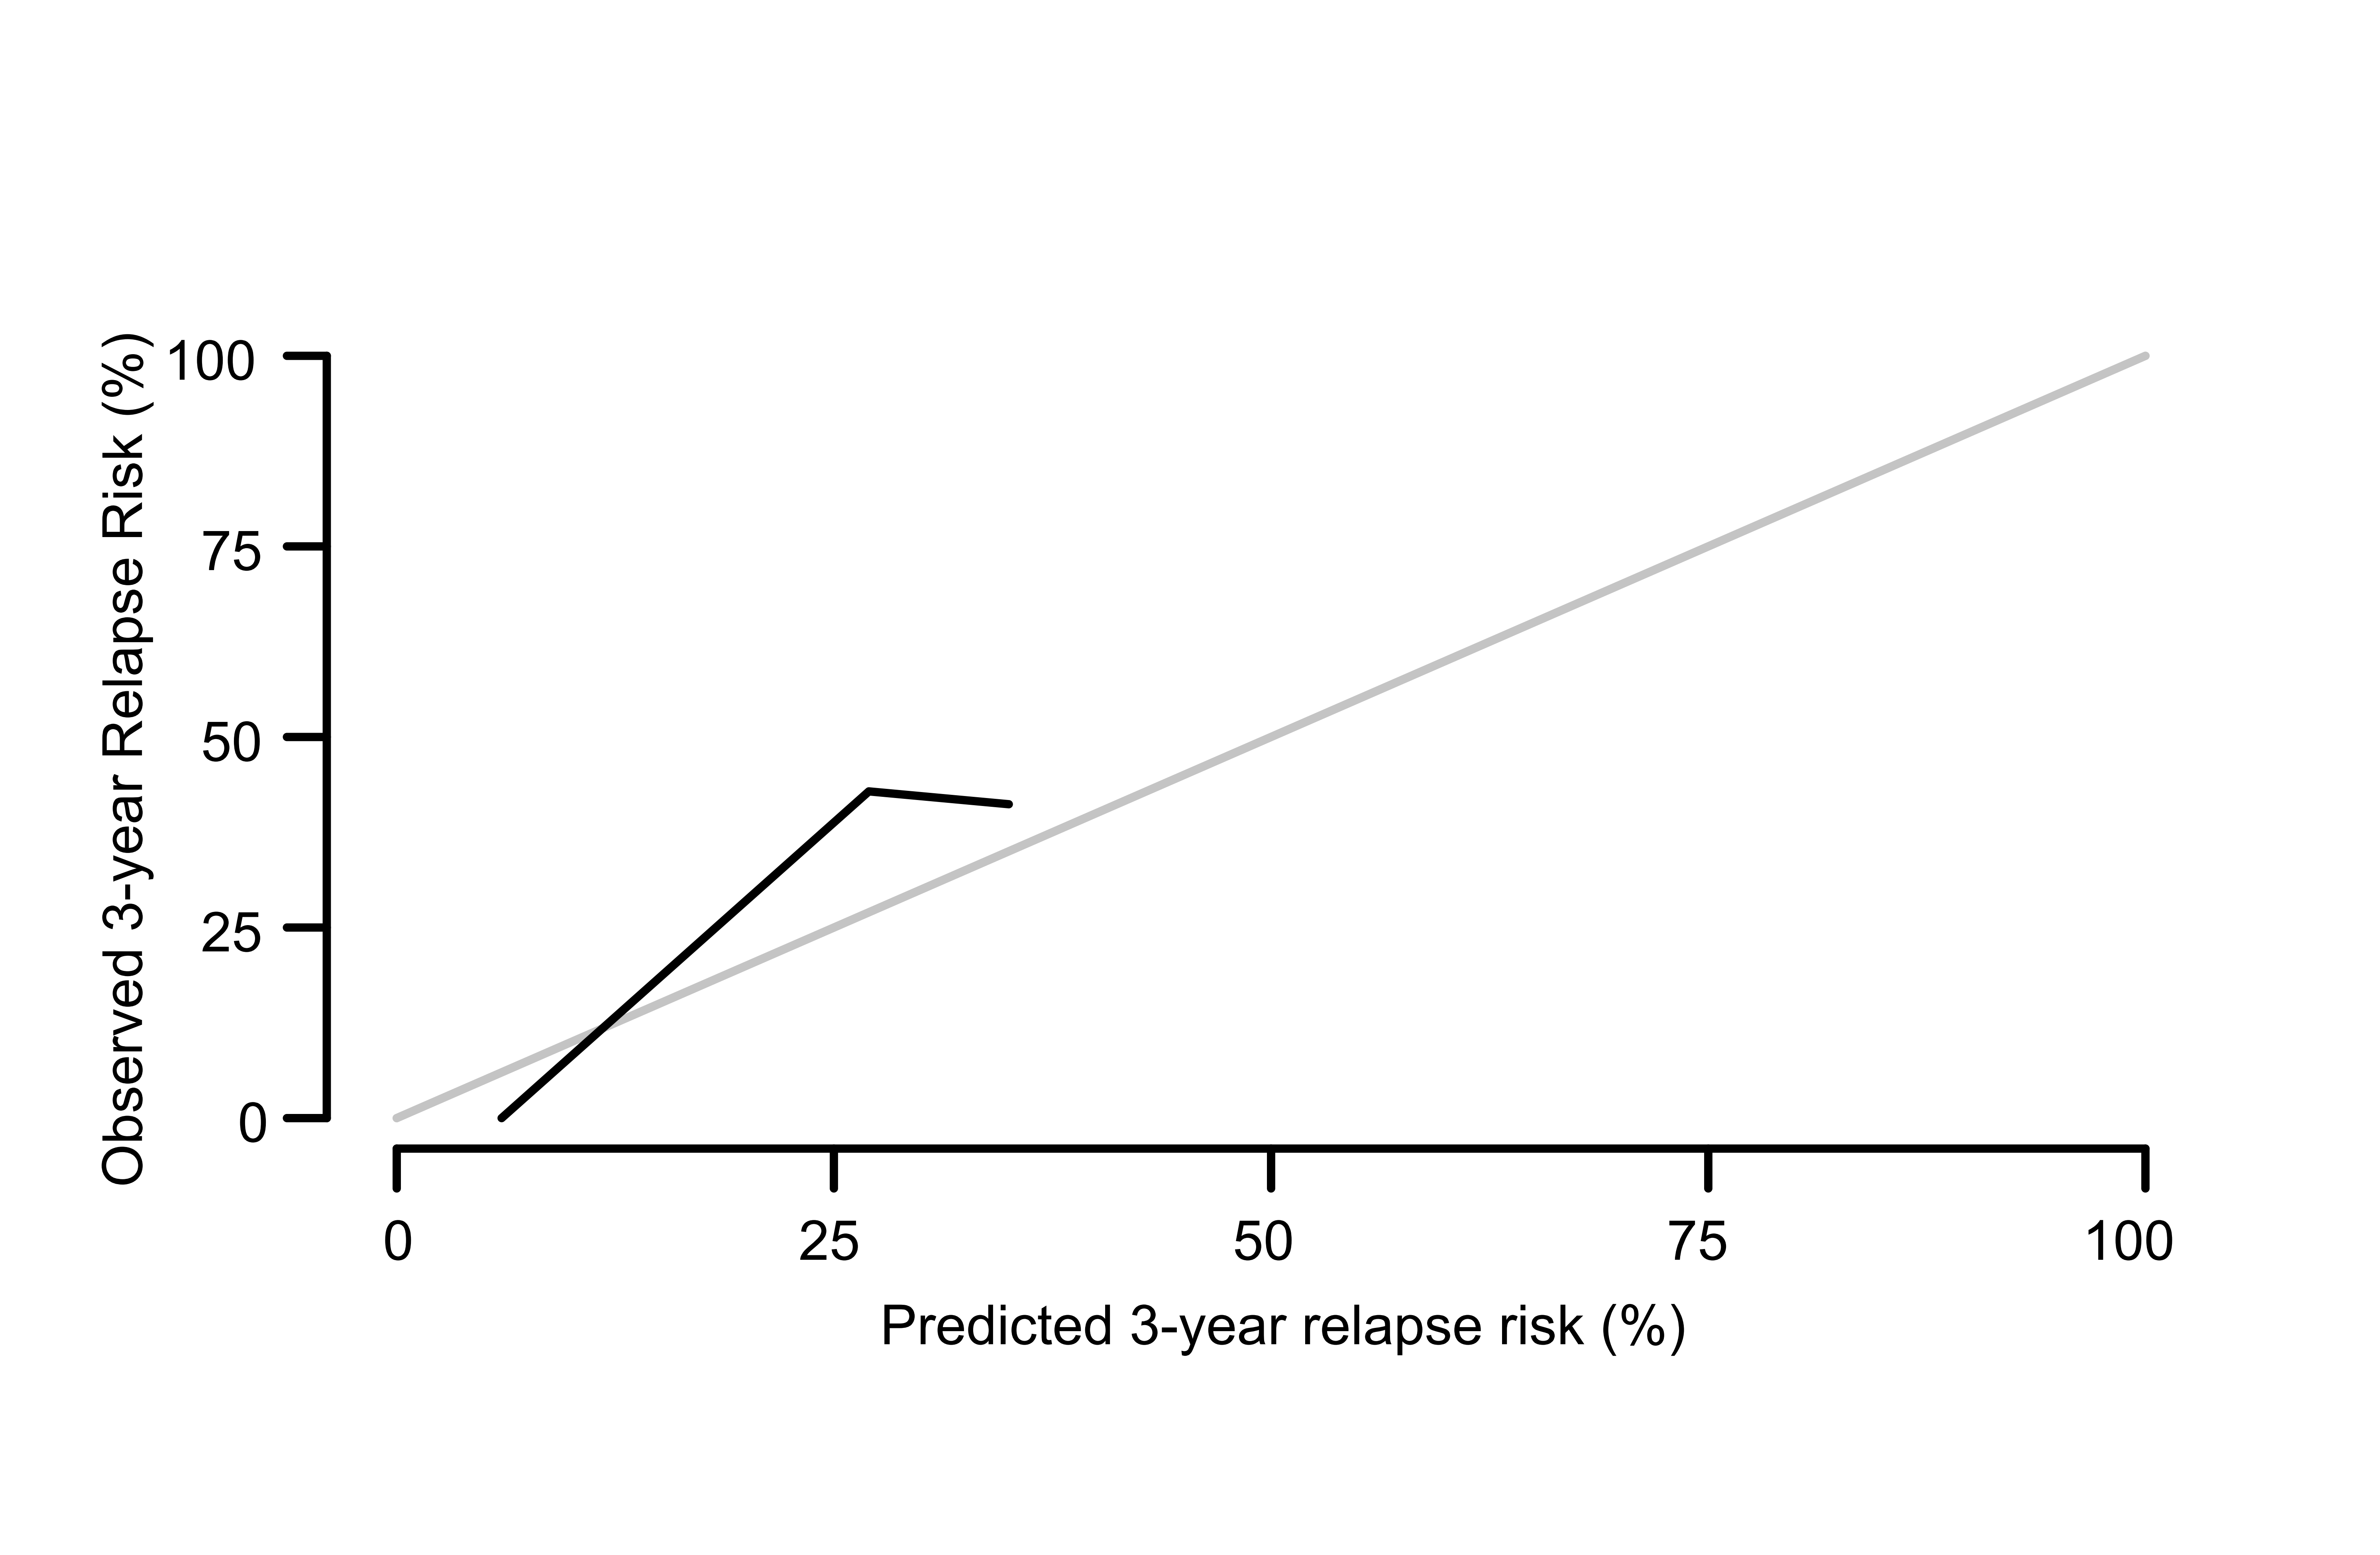
**Supplementary Figure S7.** Calibration plot for the 3-year relapse risk predicted by the Fine–Gray model in the NK-measured development cohort. The x-axis represents the predicted 3-year relapse risk, and the y-axis represents the observed 3-year relapse risk. The grey line indicates perfect agreement between predicted and observed risk, and the black line represents the model calibration curve. Model performance is summarized by the apparent 3-year time-dependent AUC of 0.539 (0.255–0.823). Bootstrap internal validation with 500 resamples showed a mean optimism of 0.015 for the 3-year AUC, yielding an optimism-corrected AUC of 0.523. The apparent calibration slope was 2.273, and the optimism-corrected calibration slope was 0.775, suggesting some degree of overfitting. CI, confidence interval.
